# Supplementary material
Source: publisher figshare collection journal article supplement (https://future-science-group.figshare.com/articles/dataset/_/23798868)
Supplement: Supplementary file 8 [file 1]

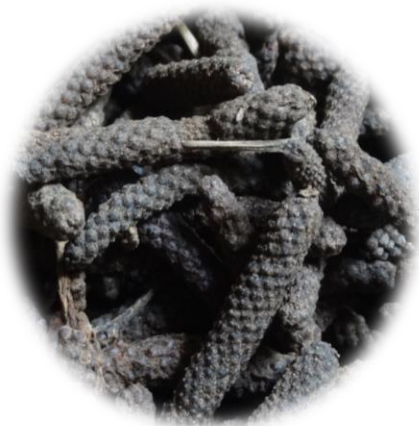

**Dried fruits of  
*Piper longum***

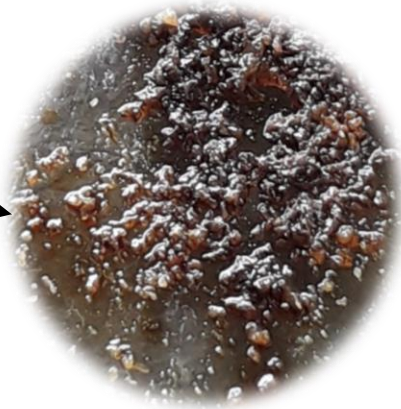

**Standardized  
*Piper longum* fruits  
ethanolic extract (PLFEE)**

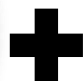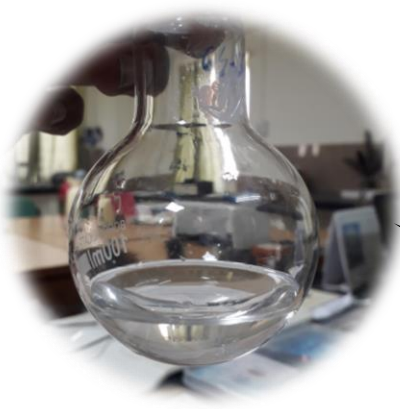

**Phospholipon® 90 H  
and Tween® 80 in  
ethanol**

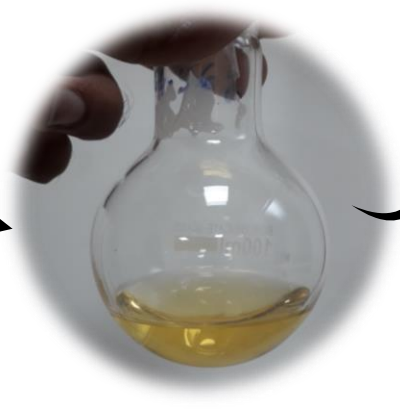

**Ethanolic solution of  
PLFEE and excipients**

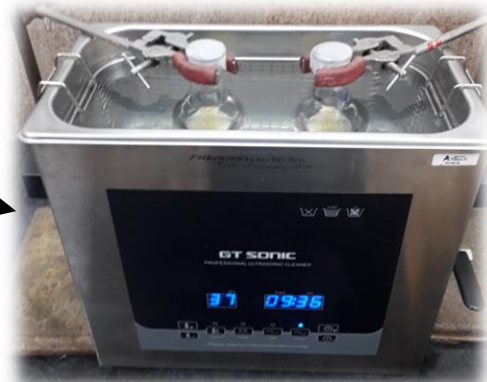

**Bath Sonication**

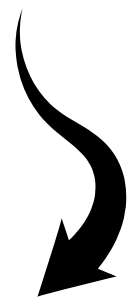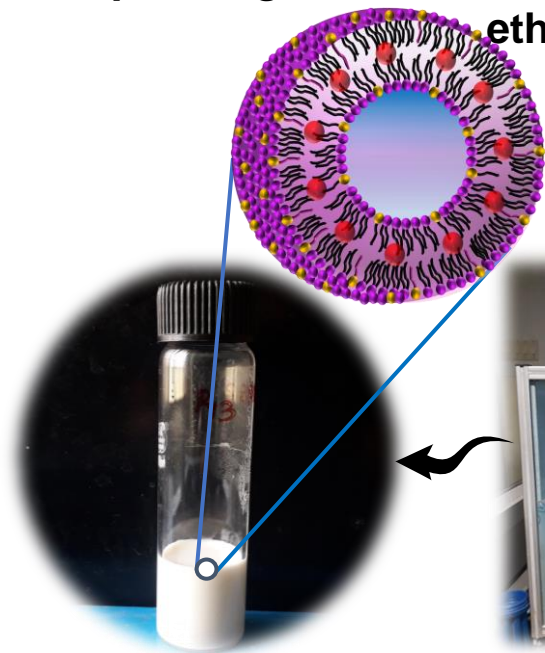

**Transfersome (TFs)**

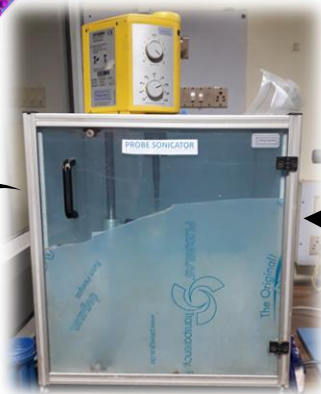

**Probe Sonication**

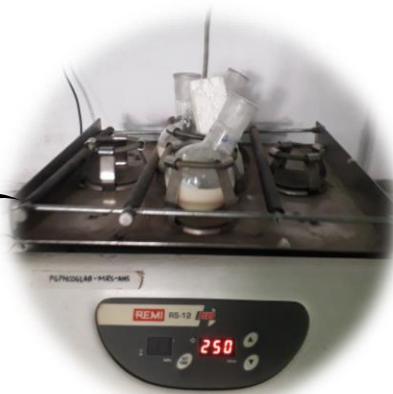

**Thin film hydration**

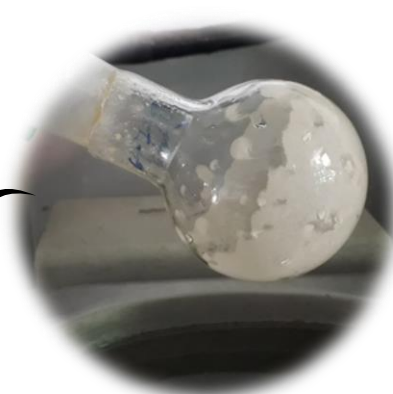

**Thin film**

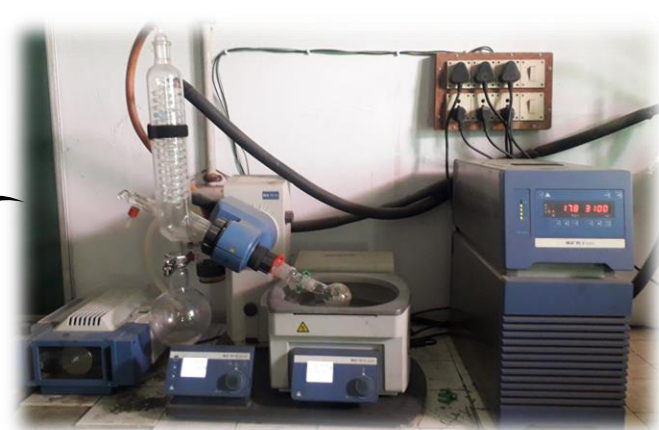

**Rotary vacuum  
evaporation**
