# Supplementary material
Source: publisher figshare collection journal article supplement (https://future-science-group.figshare.com/articles/dataset/_/23798868)
Supplement: Supplementary file 9 [file 1]

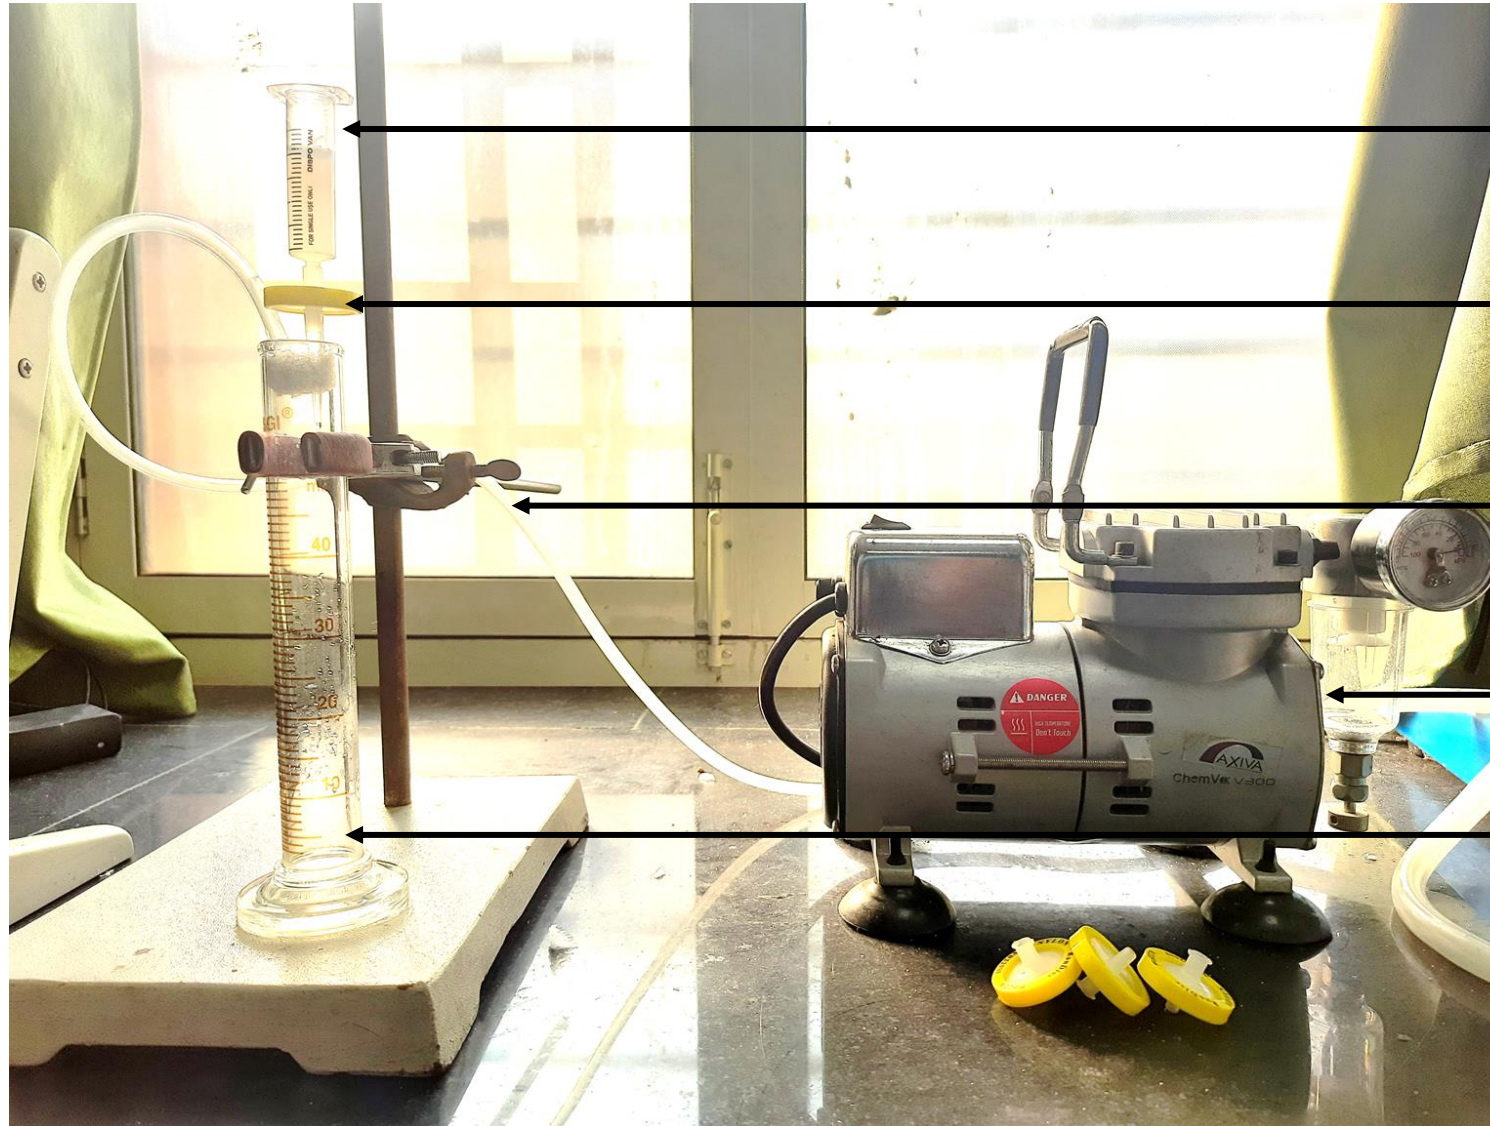

**A syringe loaded with TFs**

**Membrane filter (0.05  $\mu\text{m}$ )**

**Pipe connected to a vacuum pump**

**Vacuum pump**

**Measuring cylinder**
