# Supplementary material
Source: publisher figshare collection journal article supplement (https://future-science-group.figshare.com/articles/dataset/_/23798868)

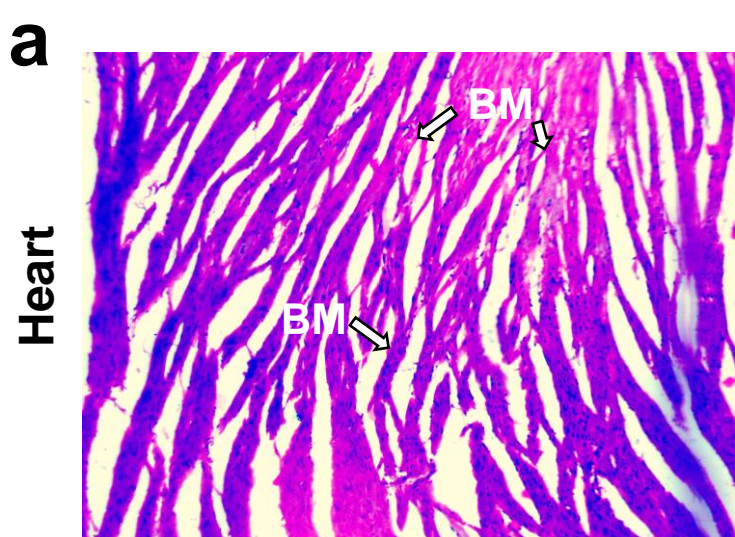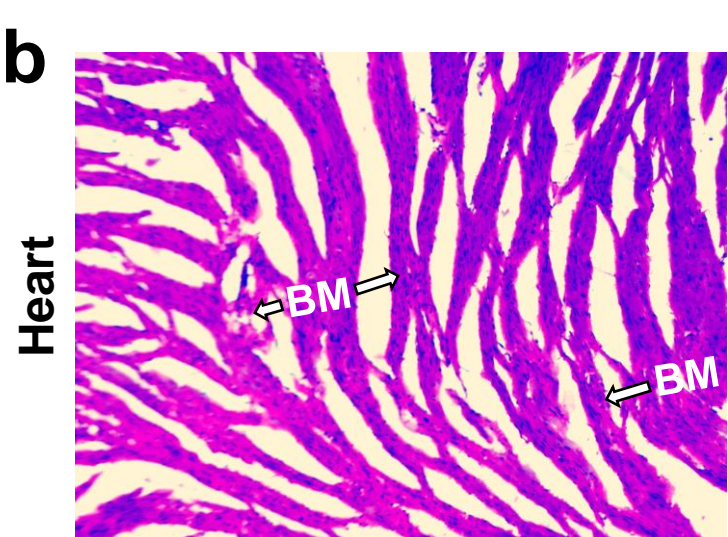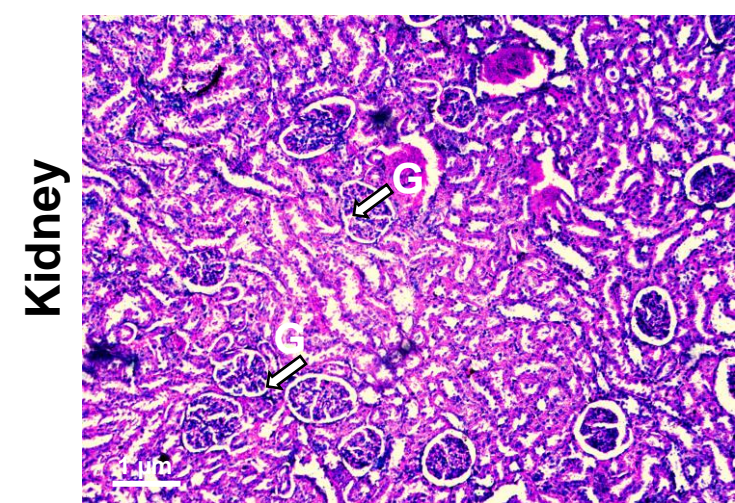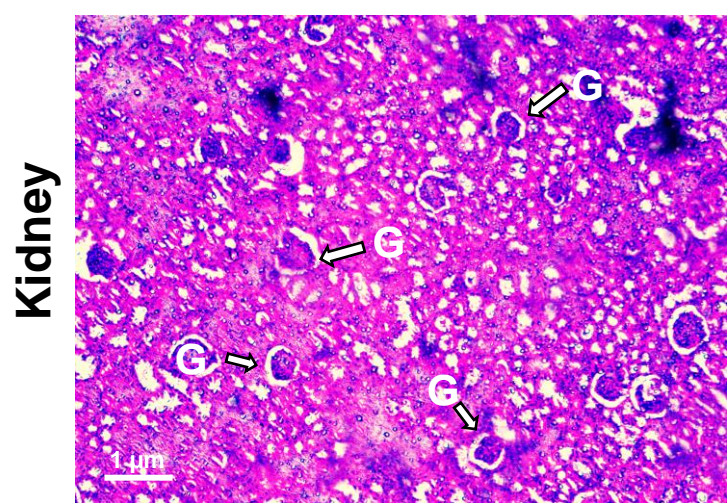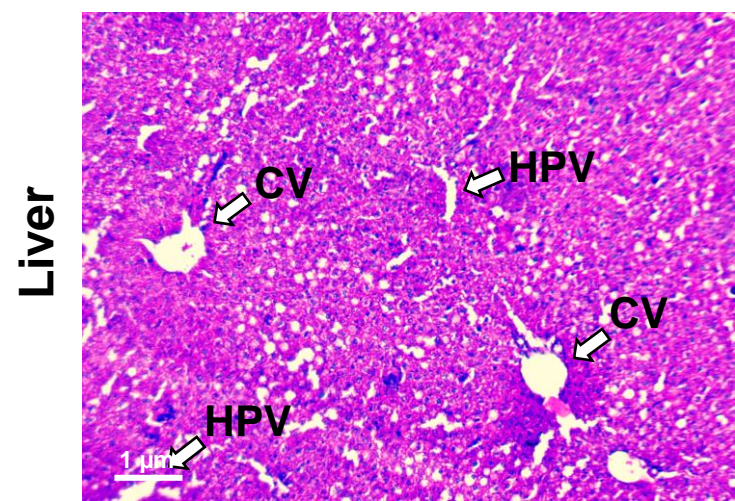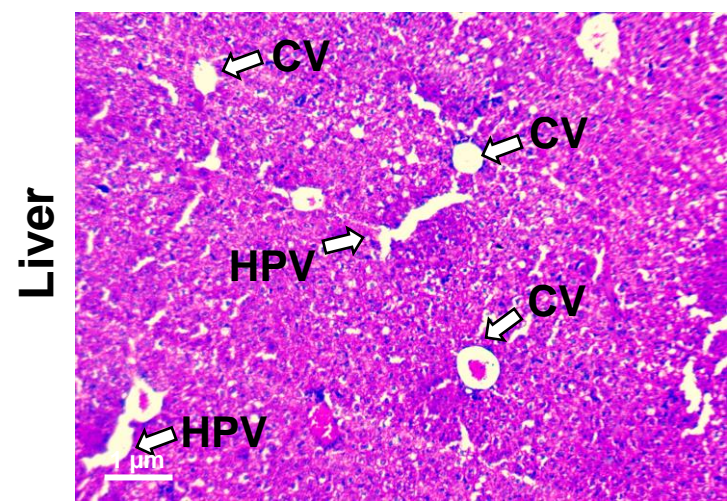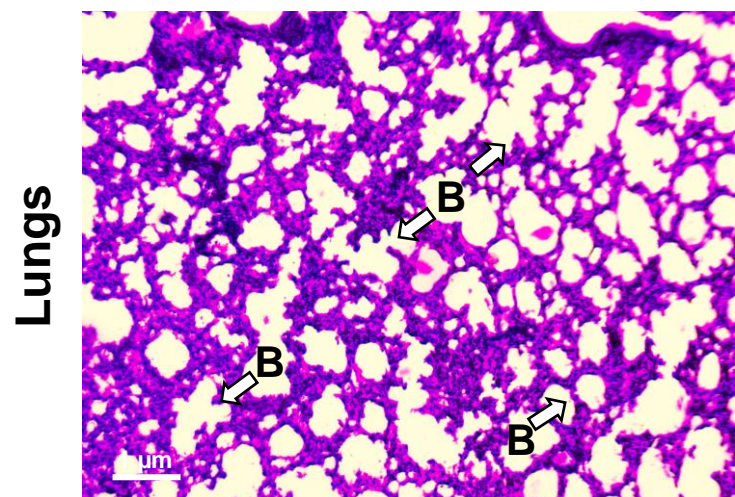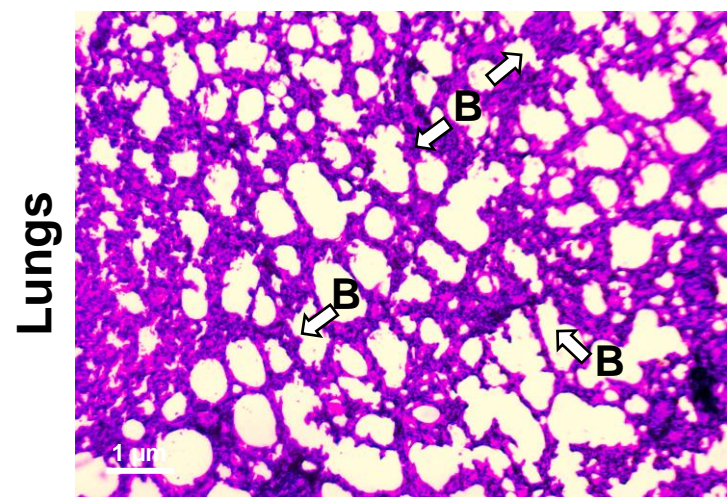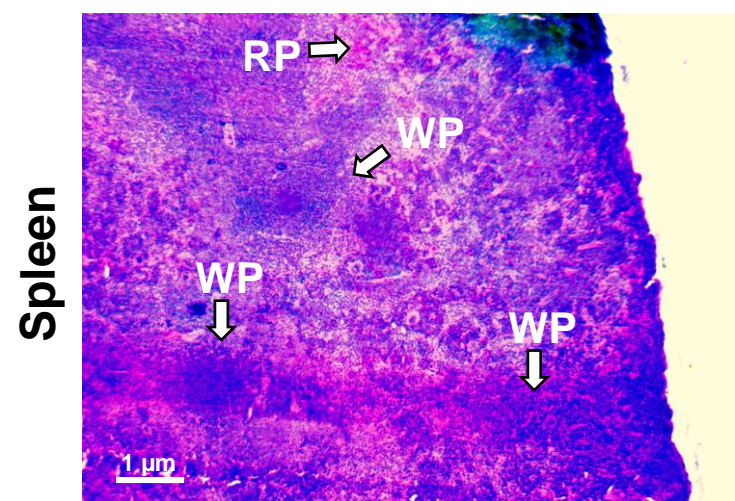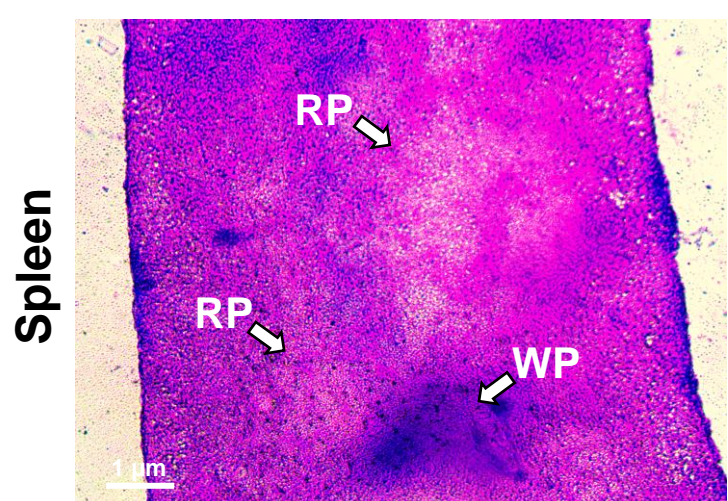

Supplement: Supplementary file 1 [file 1]

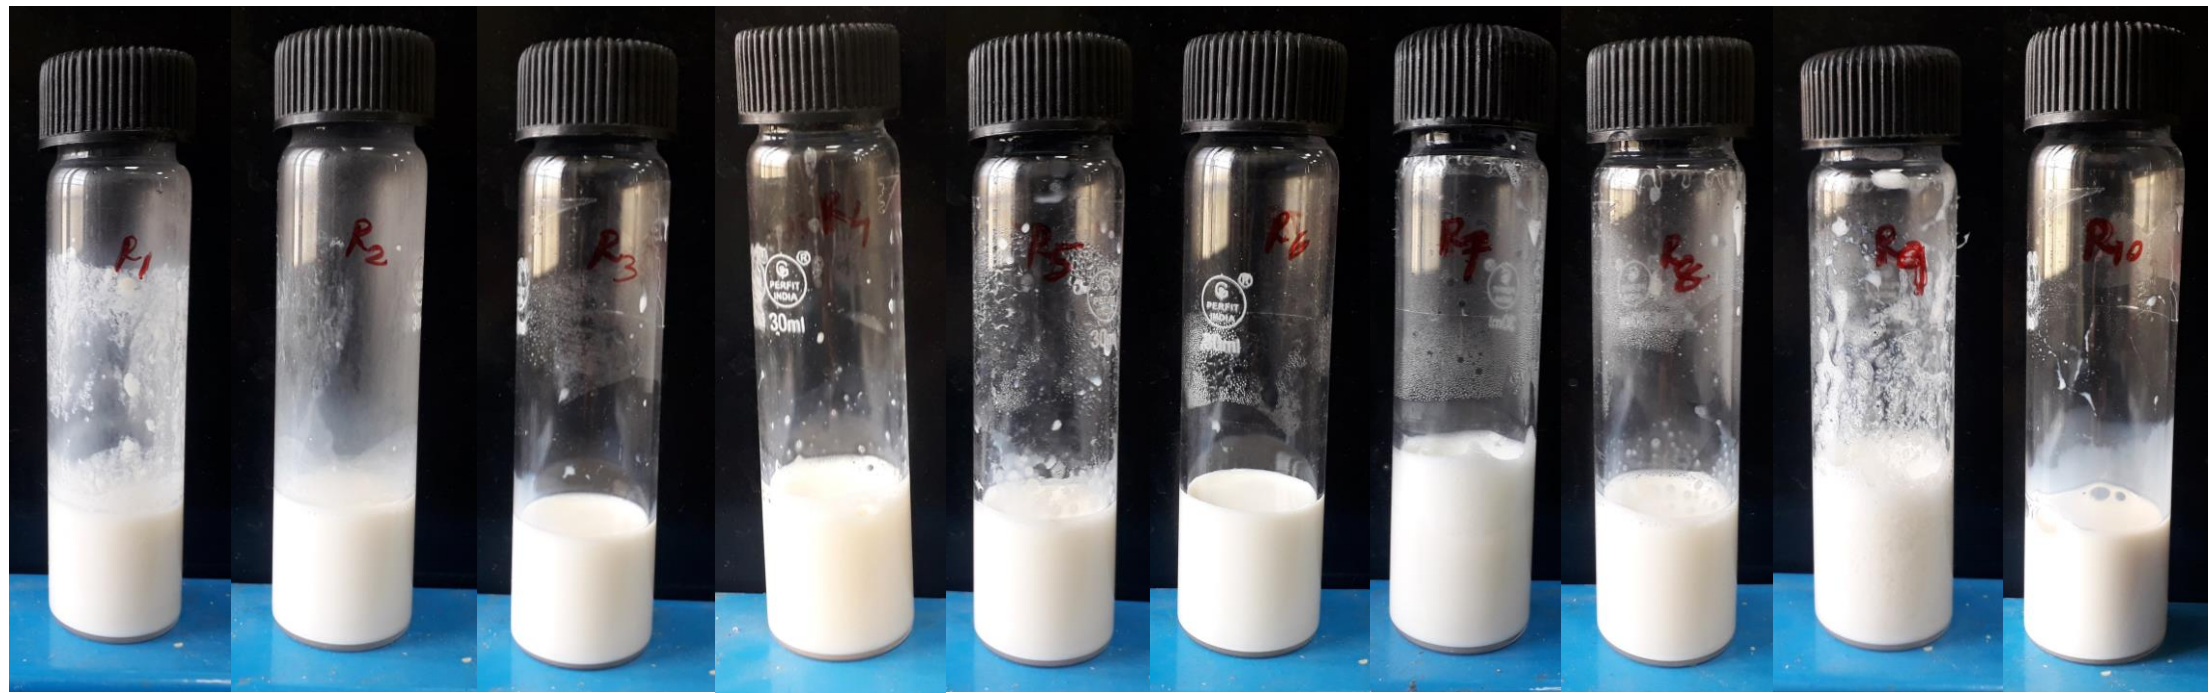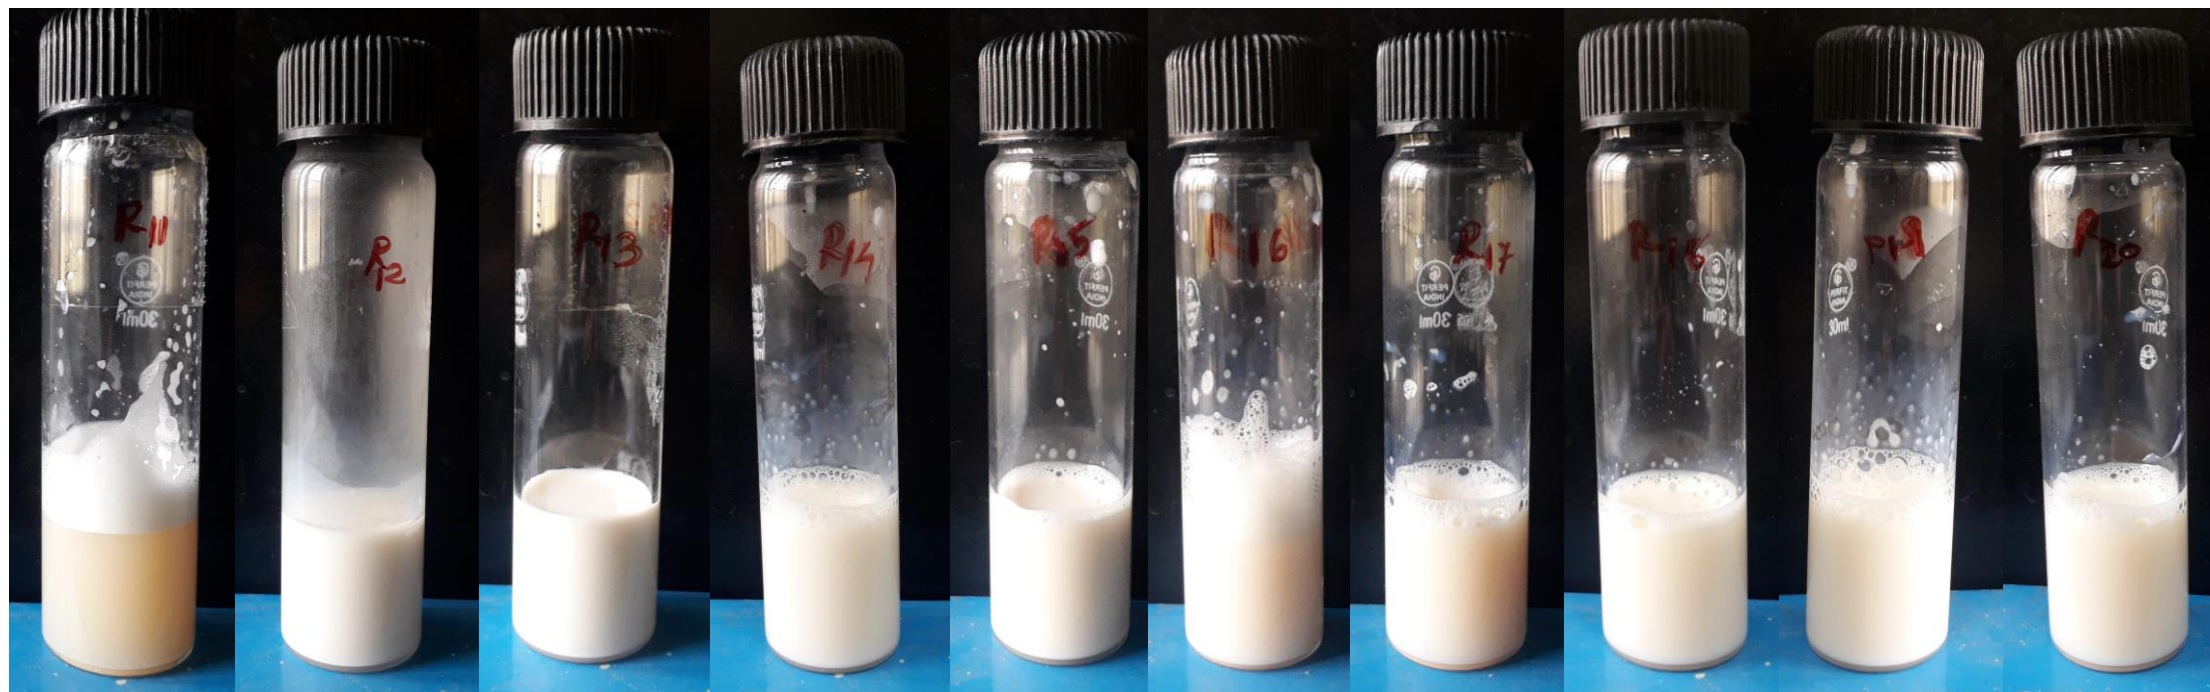

Supplement: Supplementary file 2 [file 1]

**a**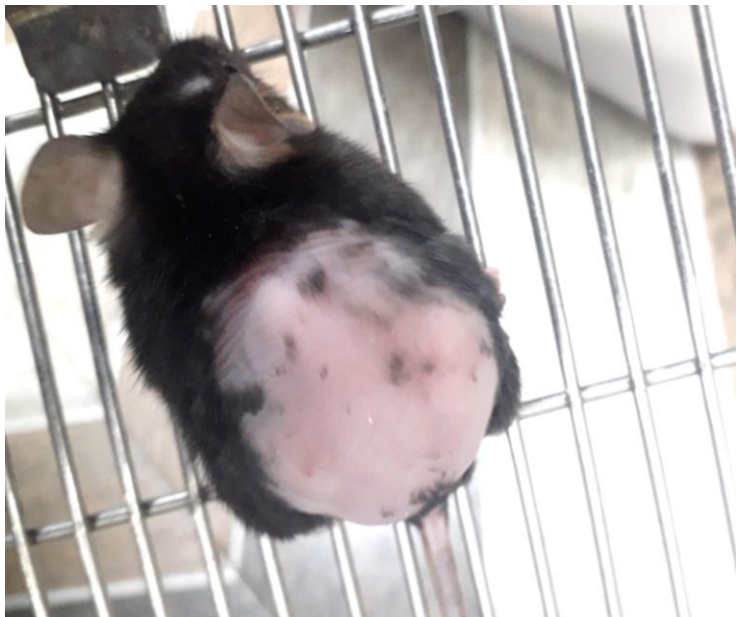**b**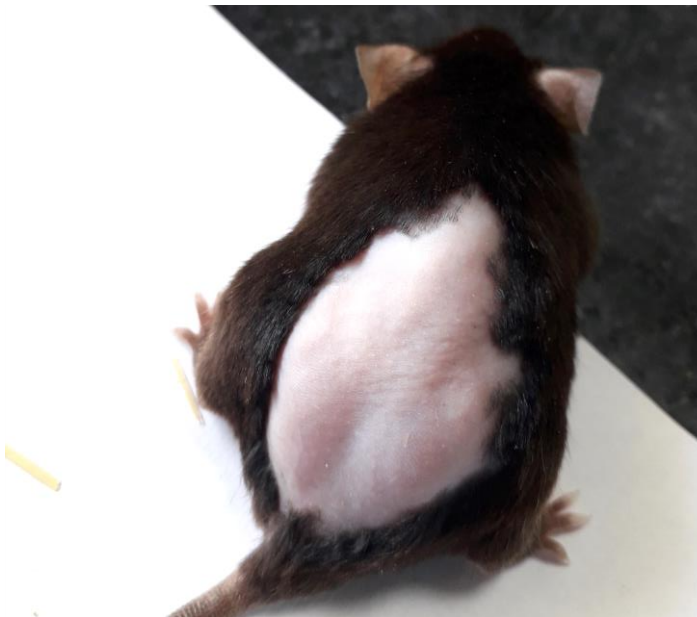**c**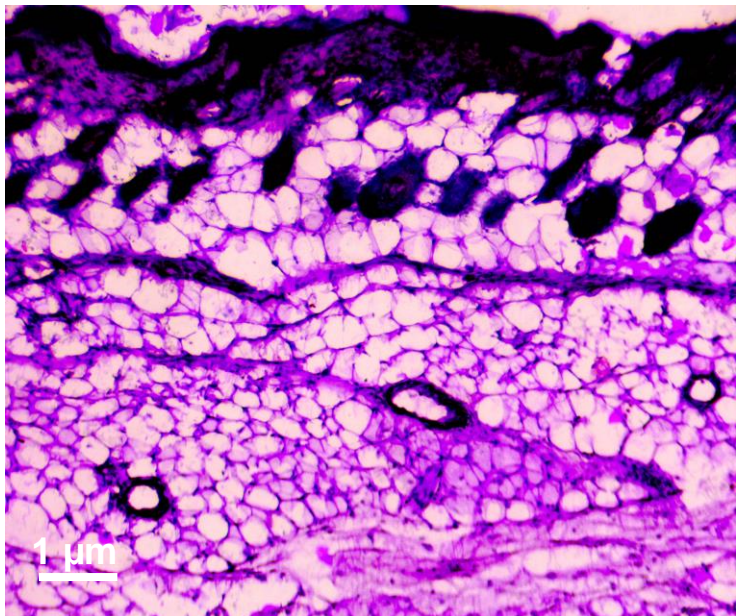**d**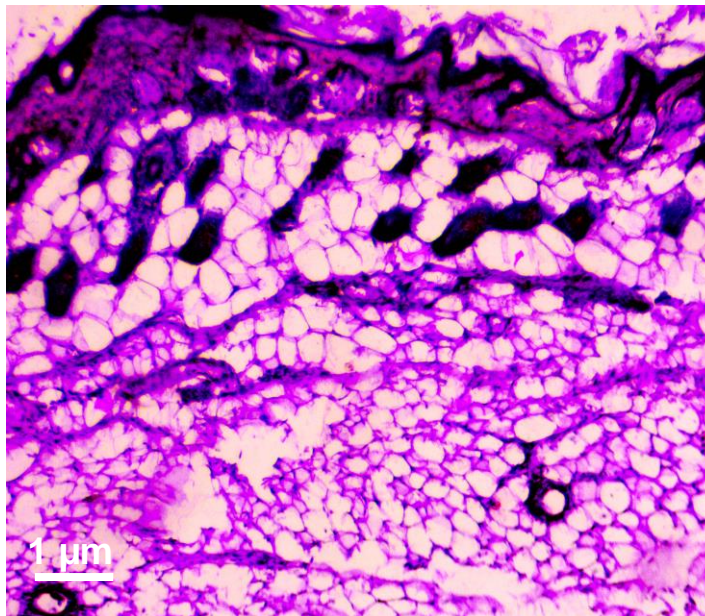

} Epidermis  
} Dermis  
} Hypodermis

Supplement: Supplementary file 3 [file 1]

**A**

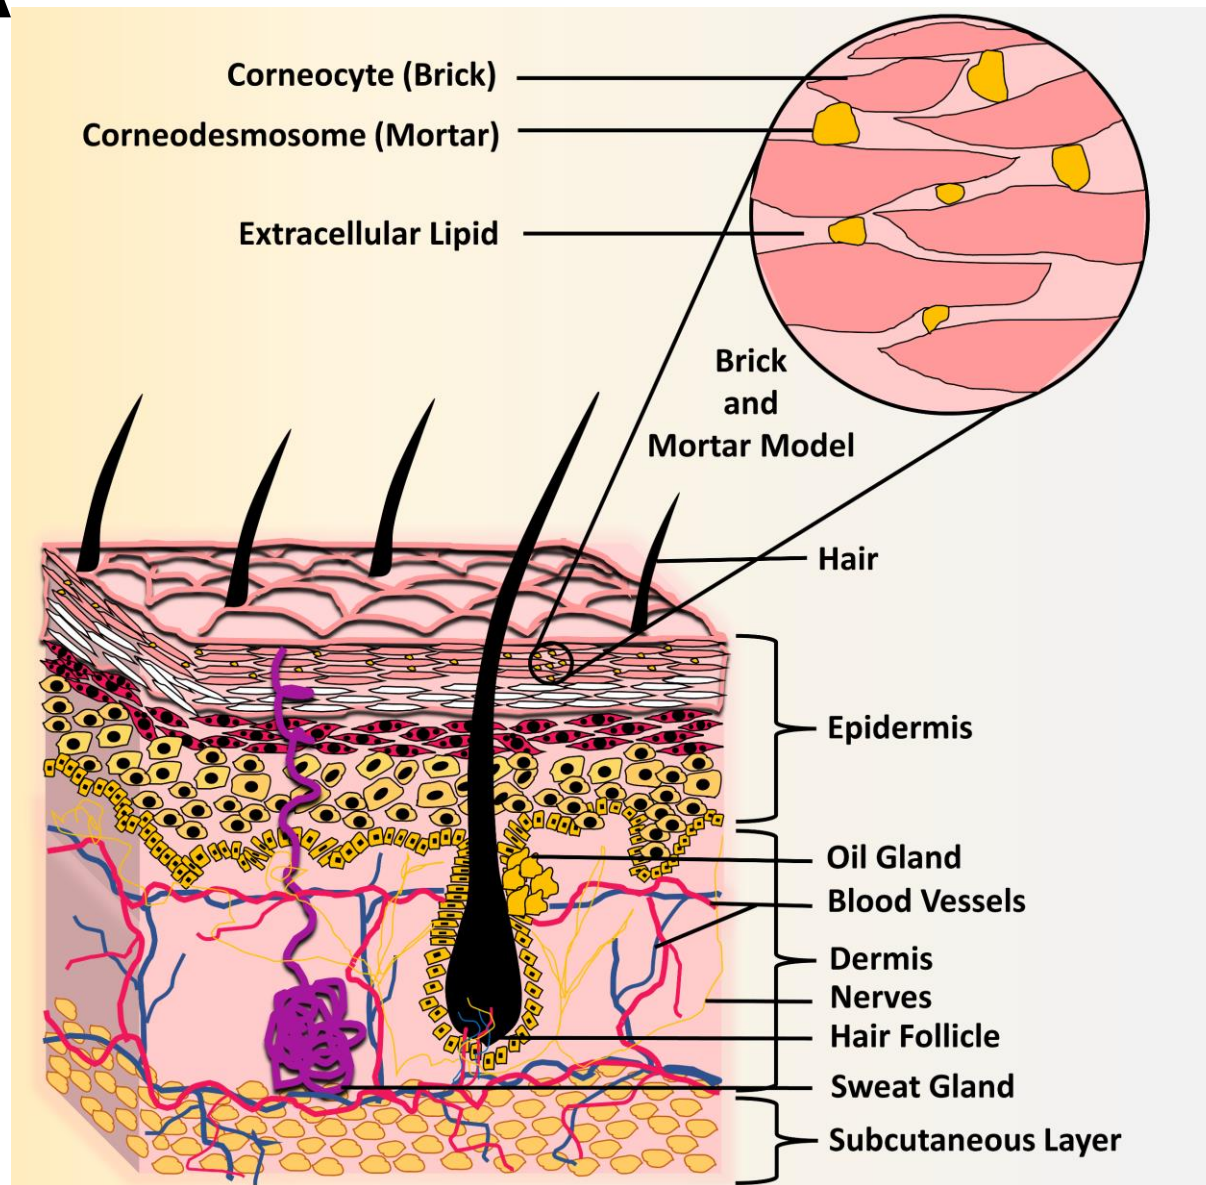

**B**

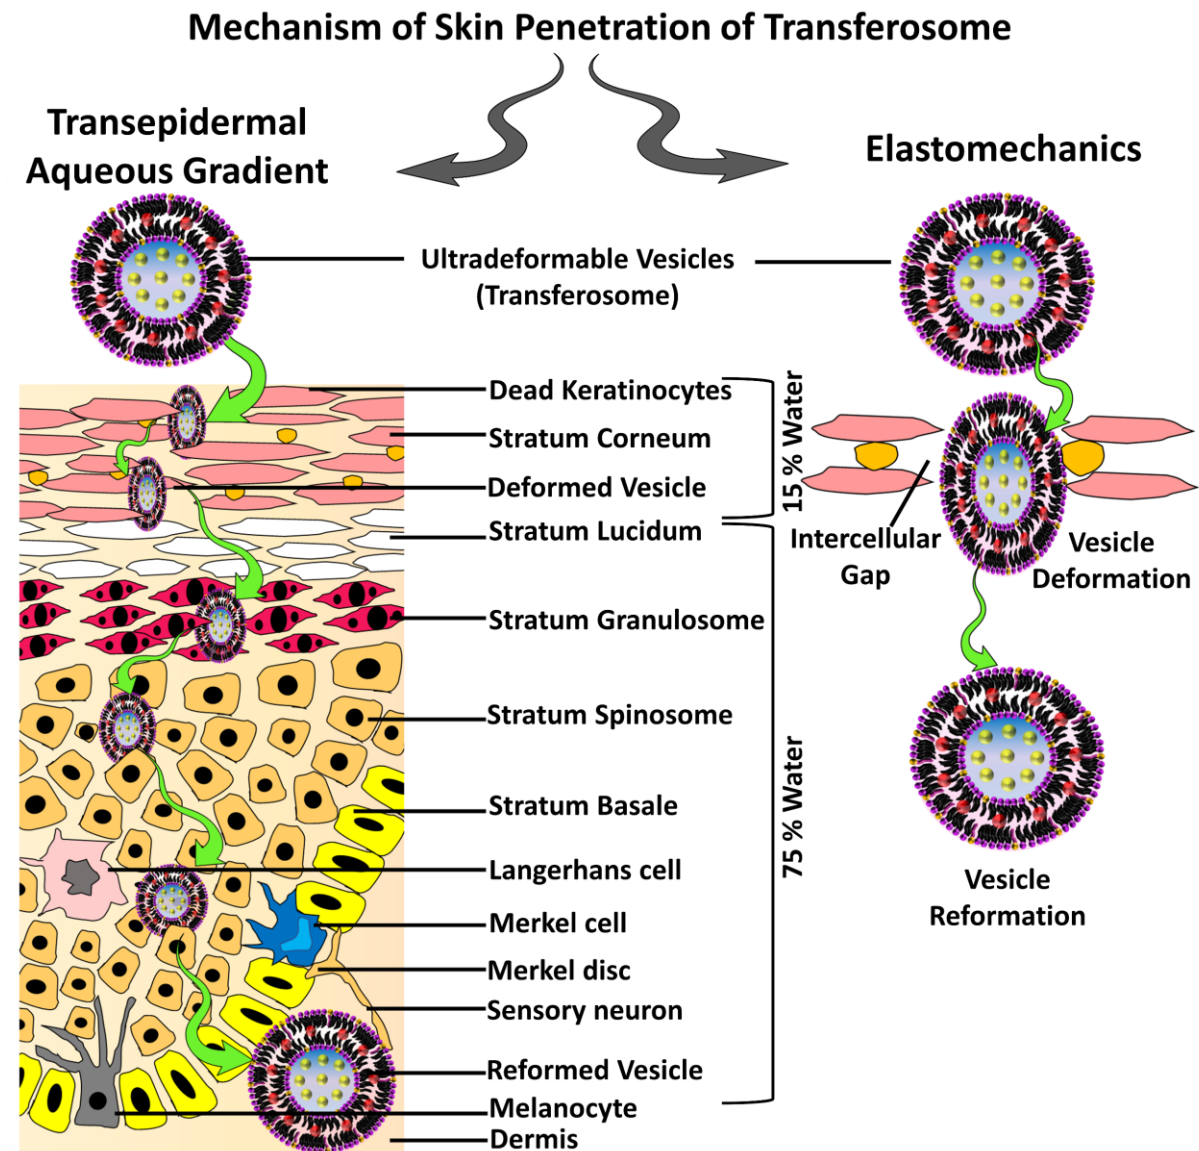

Supplement: Supplementary file 4 [file 1]

**A**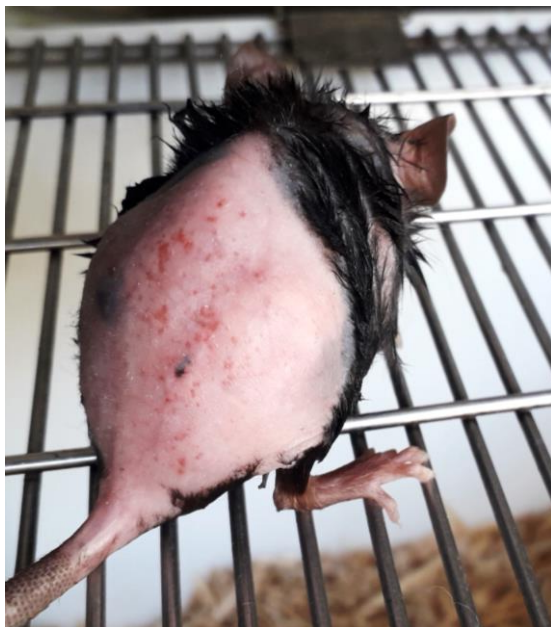**B**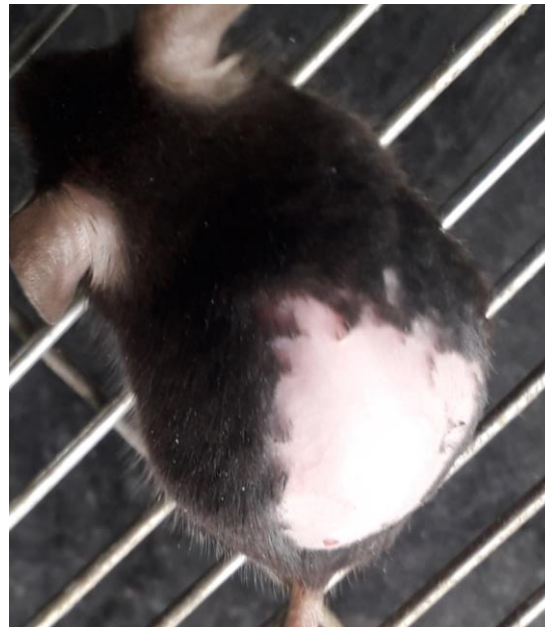**C**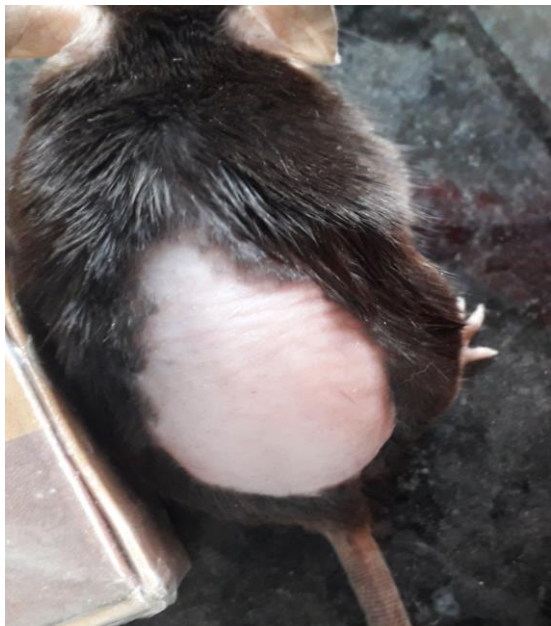**D**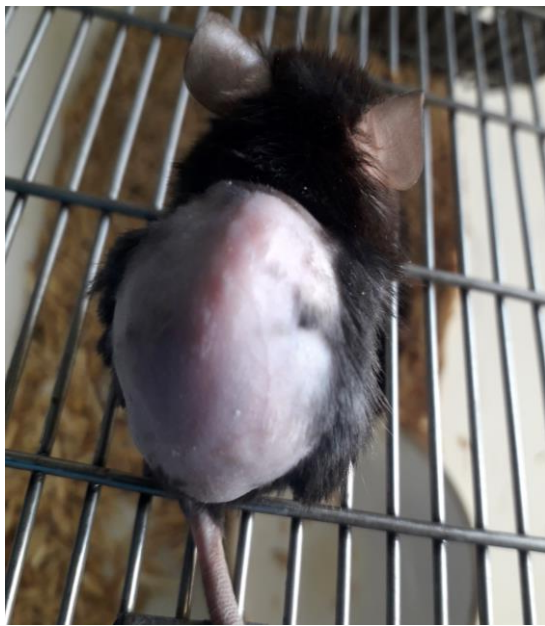

Supplement: Supplementary file 5 [file 1]

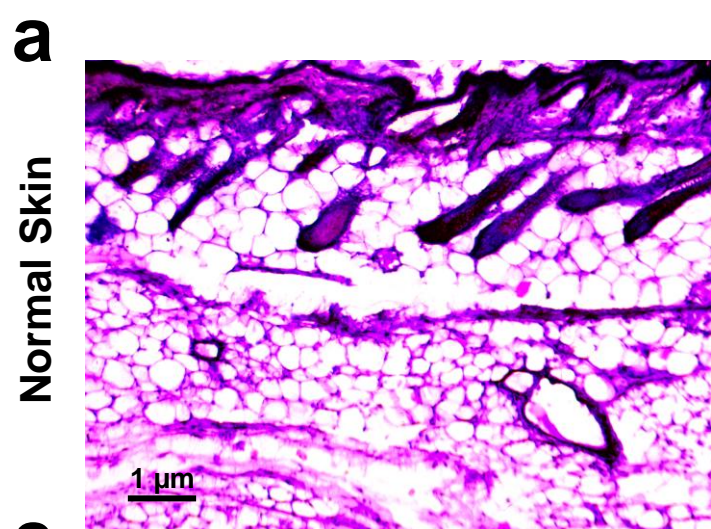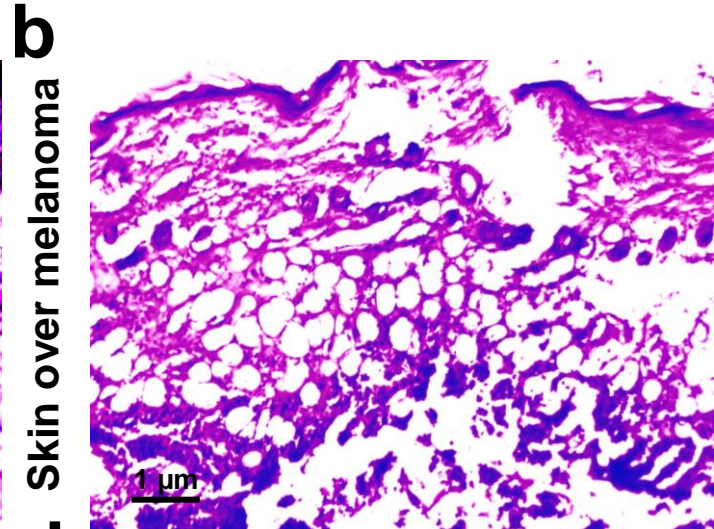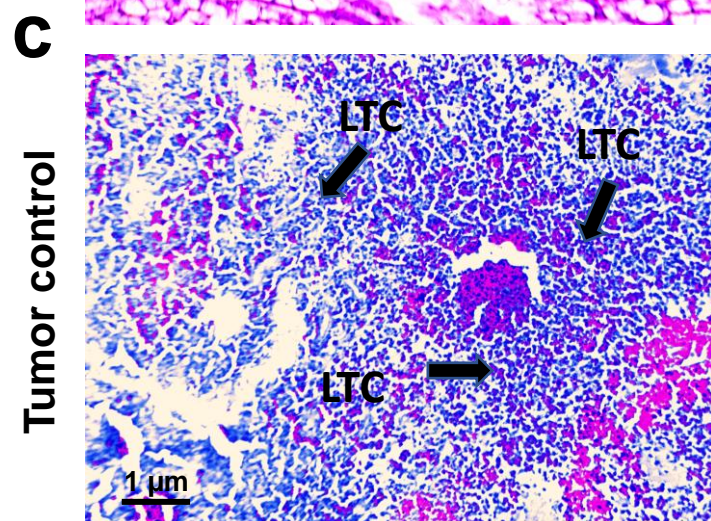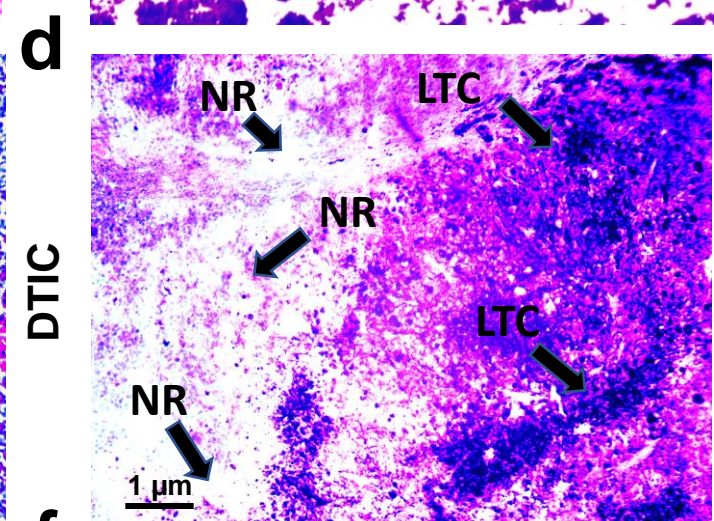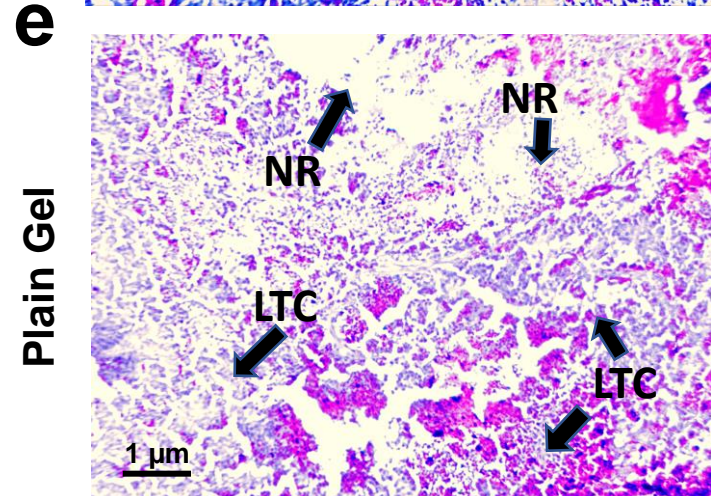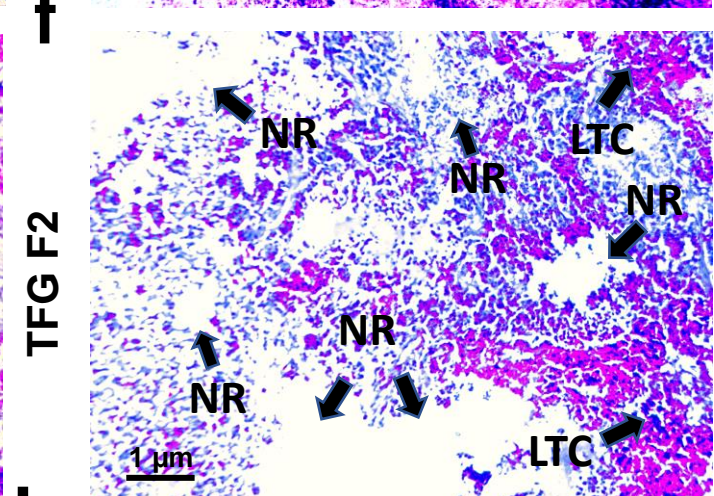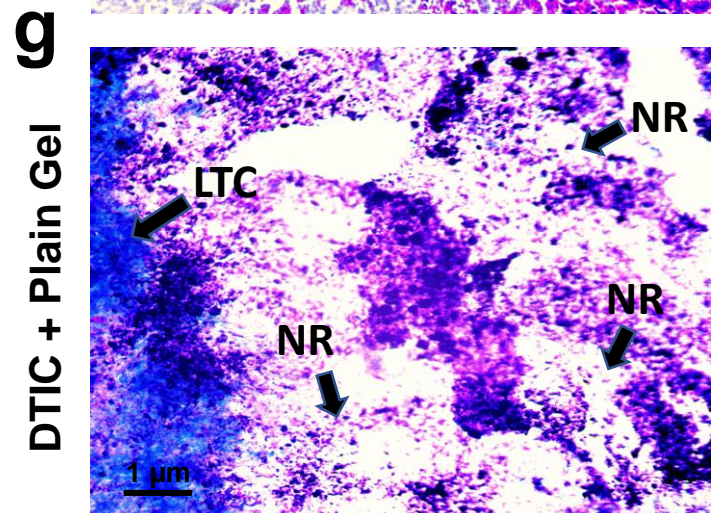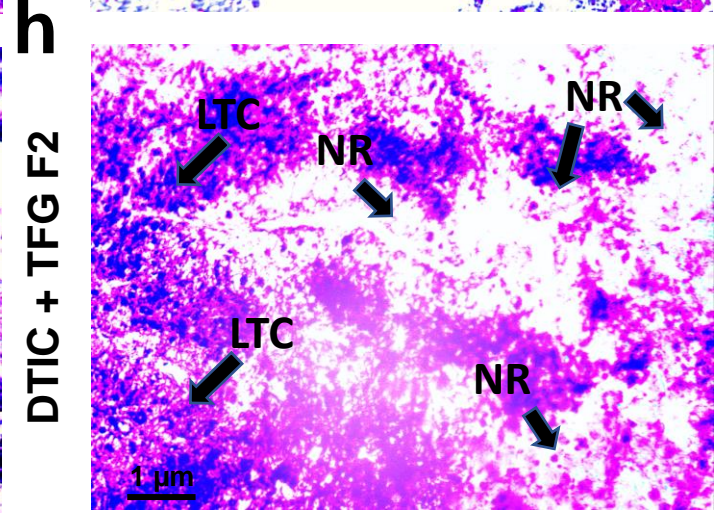

Supplement: Supplementary file 6 [file 1]

**a**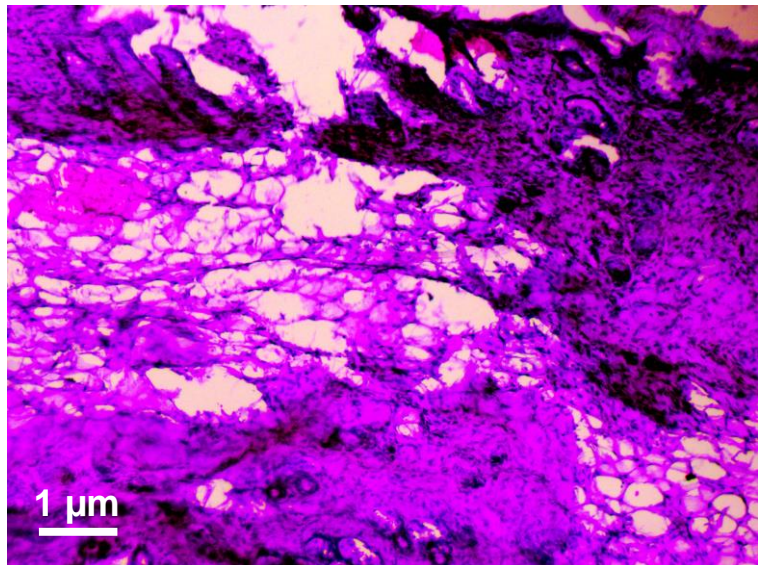**b**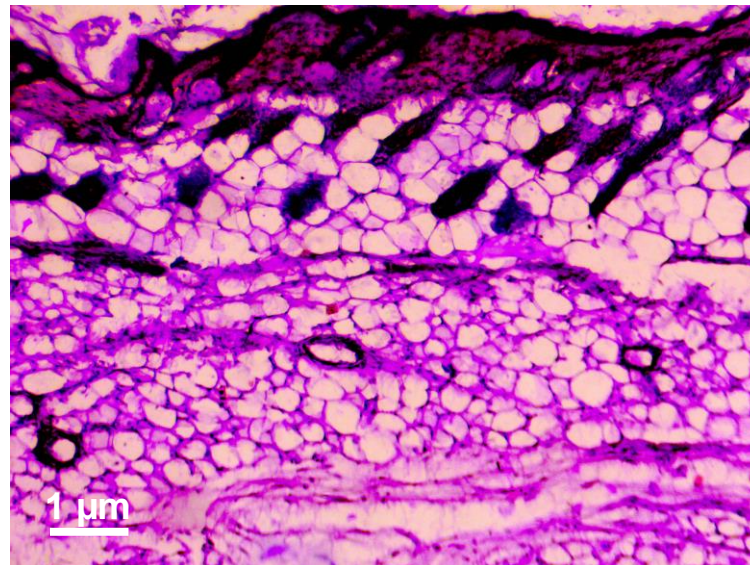

} Epidermis  
} Dermis  
} Hypodermis

**c**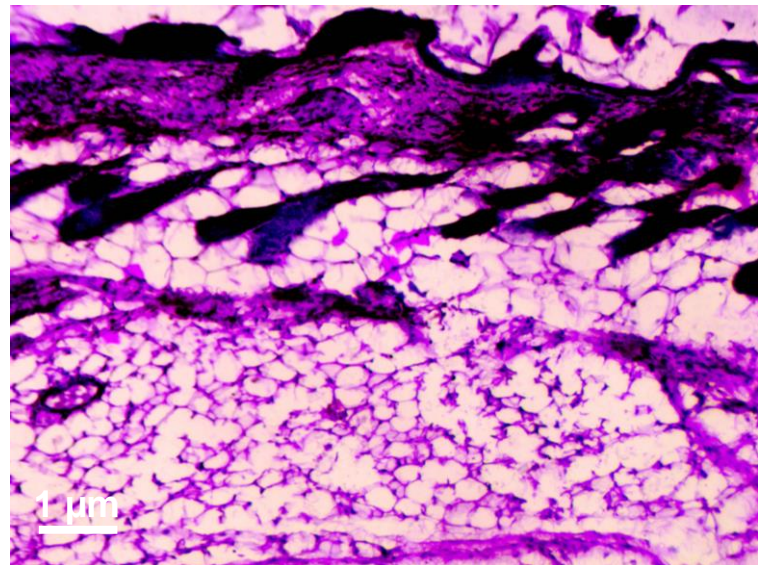**d**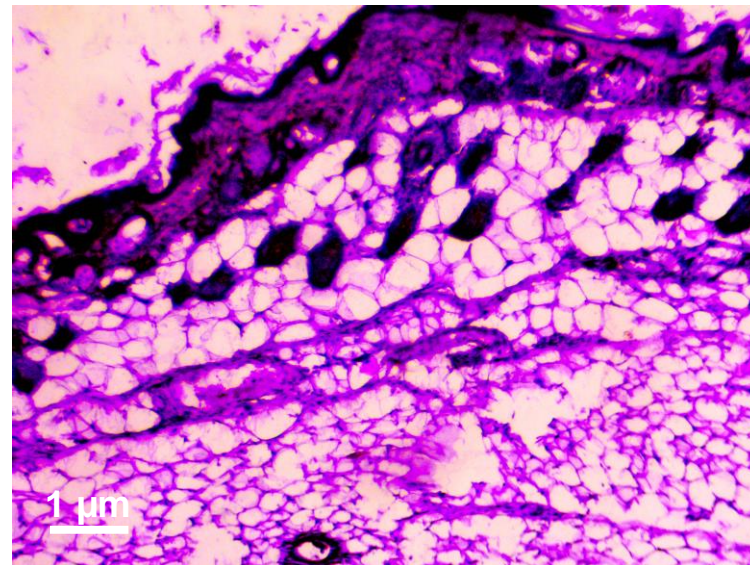

Supplement: Supplementary file 7 [file 1]
